# Supplementary material
Source: PubMed Central journal article supplement (PMC4326917)

Color Key

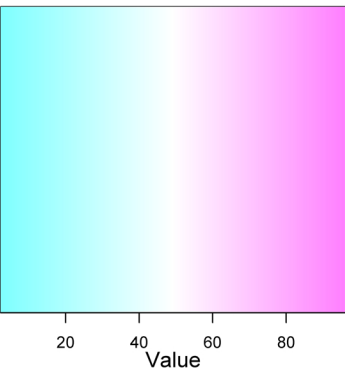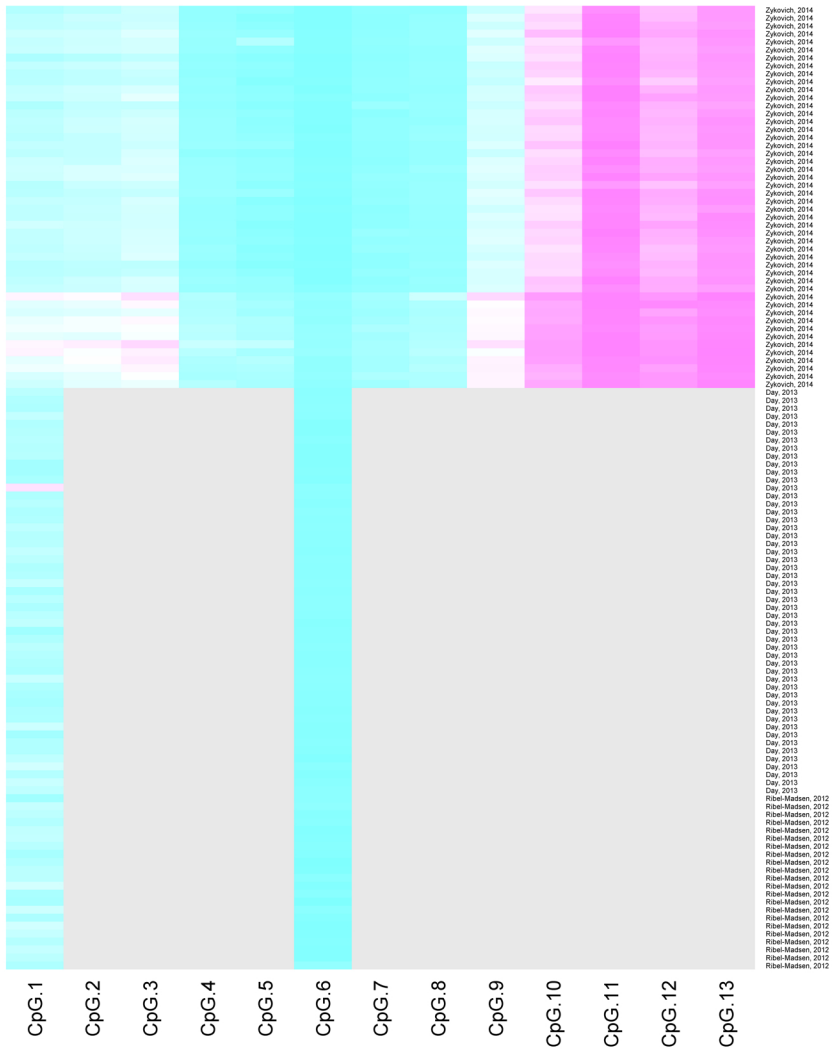

Supplement: acel0014-0049-sd6.pdf [file acel0014-0049-sd6.pdf]
